# Supplementary material
Source: PubMed Central journal article supplement (PMC4199926)

## APPENDIX

**Supplemental Table 1. Baseline characteristics of patients in the analytic cohort vs. missing**

|                                  | <b>Analytic Population<br/>n=3367</b> | <b>Missing<br/>n=618</b> | <b>P-Value</b> |
|----------------------------------|---------------------------------------|--------------------------|----------------|
| Age (y)                          | 59.3 ± 12.1                           | 57.0 ± 13.7              | <0.001         |
| White race                       | 70.8%                                 | 53.5%                    | <0.001         |
| Male                             | 67.0%                                 | 65.0%                    | 0.343          |
| High school or greater education | 19.9%                                 | 25.9%                    | <0.001         |
| Insurance coverage for meds      | 74.5%                                 | 64.0%                    | <0.001         |
| Hypertension                     | 65.9%                                 | 69.6%                    | 0.078          |
| Current smoking                  | 37.5%                                 | 42.4%                    | 0.022          |
| Depressive symptoms              | 15.9%                                 | 17.8%                    | 0.267          |
| HbA1c (%)                        | 6.4 ± 1.7                             | 6.6 ± 1.9                | 0.102          |
| History of DM                    | 32.1%                                 | 37.5%                    | 0.008          |
| History of PCI                   | 20.0%                                 | 20.1%                    | 0.965          |
| History of CABG                  | 11.3%                                 | 11.5%                    | 0.884          |
| ST-elevations on arrival         | 44.2%                                 | 36.9%                    | <0.001         |
| Multivessel disease              | 48.9%                                 | 49.2%                    | 0.919          |
| LV systolic dysfunction          | 17.5%                                 | 21.4%                    | 0.022          |
| GRACE discharge score            | 100.1 ± 29.3                          | 100.5 ± 34.0             | 0.769          |
| In-hospital PCI                  | 67.0%                                 | 57.0%                    | <0.001         |
| In-hospital CABG                 | 9.6%                                  | 7.4%                     | 0.094          |
| % reporting angina               | 44.4%                                 | 49.1%                    | 0.034          |
| SAQ Angina Frequency             | 86.3 ± 20.4                           | 83.8 ± 22.4              | 0.006          |
| SAQ Quality of Life              | 63.7 ± 23.3                           | 60.9 ± 24.4              | 0.007          |
| SAQ Physical Limitation          | 86.4 ± 21.6                           | 83.3 ± 23.6              | 0.003          |
| SF-12 Physical Component         | 42.8 ± 12.2                           | 39.8 ± 12.8              | <0.001         |
| SF-12 Mental Component           | 49.9 ± 11.4                           | 48.4 ± 12.2              | 0.005          |

**Supplemental Table 2. Association of Patient and Treatment Factors with Angina after Myocardial Infarction**

|                      | <b>Risk Ratio (95% CI)</b> |
|----------------------|----------------------------|
| Age                  | Non-linear*                |
| Male sex             | 0.78 (0.71-0.85)           |
| White race           | 0.81 (0.71-0.91)           |
| Hypertension         | 1.02 (0.90-1.14)           |
| Current smoking      | 1.23 (1.14-1.32)           |
| Depression           | 1.41 (1.33-1.51)           |
| Prior PCI            | 1.21 (1.09-1.34)           |
| Prior CABG           | 1.50 (1.28-1.77)           |
| In-hospital PCI      | 0.89 (0.80-1.00)           |
| In-hospital CABG     | 0.99 (0.87-1.11)           |
| Multivessel disease  | 1.03 (0.94-1.14)           |
| LV dysfunction       | 0.97 (0.88-1.06)           |
| STEMI                | 1.01 (0.89-1.15)           |
| GRACE score          | Non-linear*                |
| Diabetes*Time effect |                            |
| Diabetes at 1 month  | 1.00 (0.90-1.12)           |
| Diabetes at 6 months | 1.16 (1.02-1.32)           |
| Diabetes at 1 year   | 1.18 (1.01-1.37)           |

**\*Association of Age and GRACE score with Angina After Myocardial Infarction.** Plus signs represent the risk ratio for angina by age (relative to age=45 years) and by GRACE score (relative to a score=100). I.e., age =45 is associated with the highest risk of angina, with ages younger and older associated with a lower risk. A GRACE score of 100 is associated with the lowest risk of angina with scores lower and higher being associated with a greater risk.

**Age:**

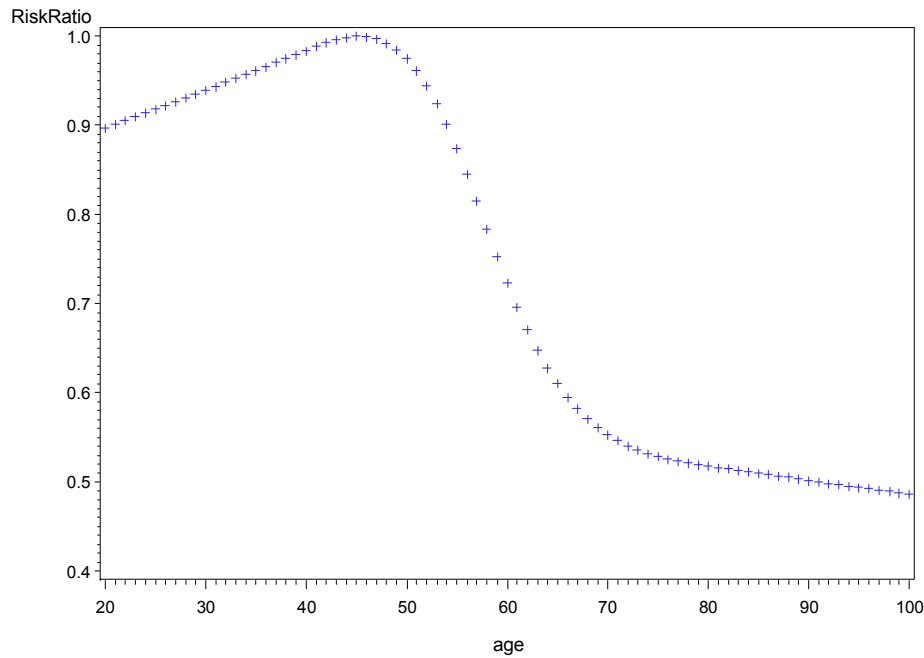

**GRACE Score:**

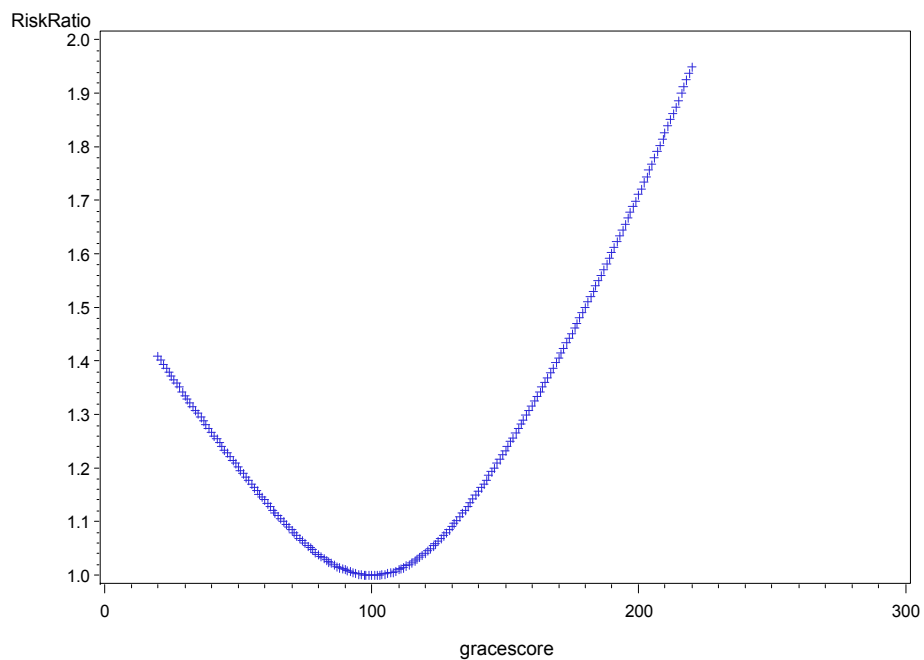

Supplement: NIHMS599906-supplement-supplement_1.pdf [file NIHMS599906-supplement-supplement_1.pdf]
